# Supplementary material
Source: PubMed Central journal article supplement (PMC3375597)
Supplement: NIHMS373749-supplement-Supp_Fig_S1-S4.pdf [file NIHMS373749-supplement-Supp_Fig_S1-S4.pdf]

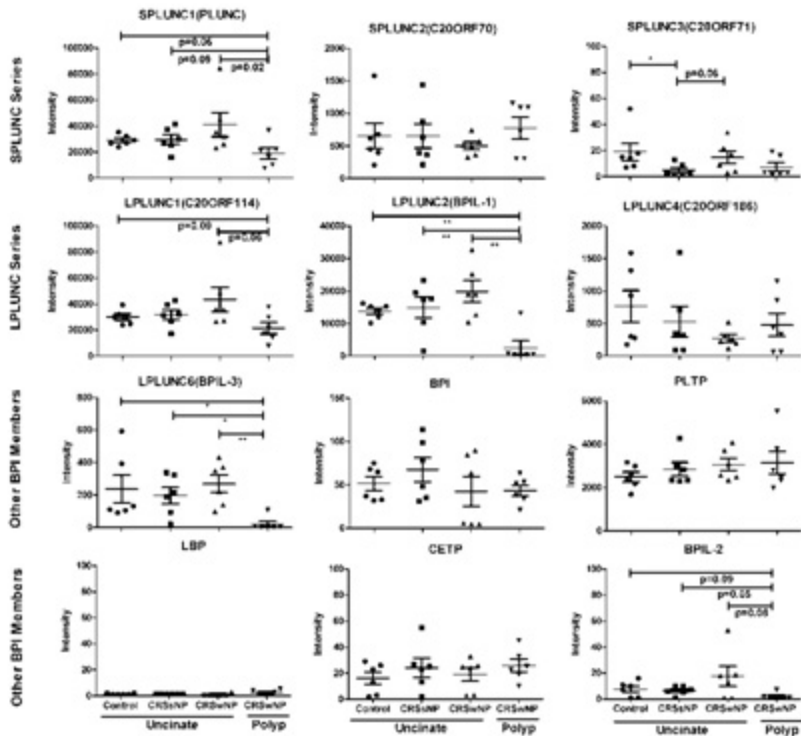

Figure E1

## SPLUNC1

Glandular Staining

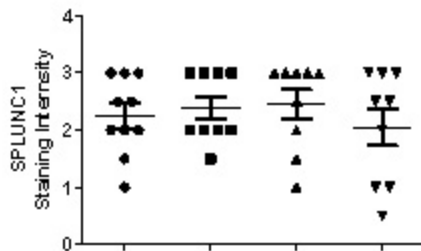

Epithelial Staining

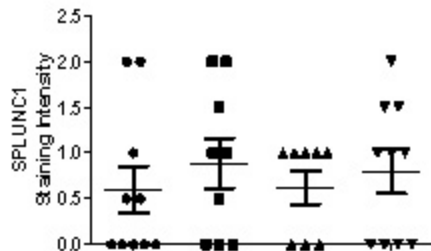

## LPLUNC2

Glandular Staining

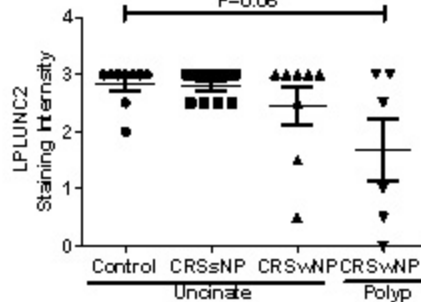

Epithelial Staining

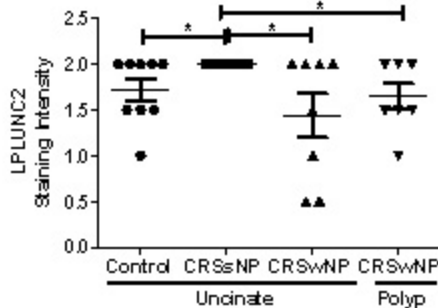

Figure E2

**A****SPLUNC1**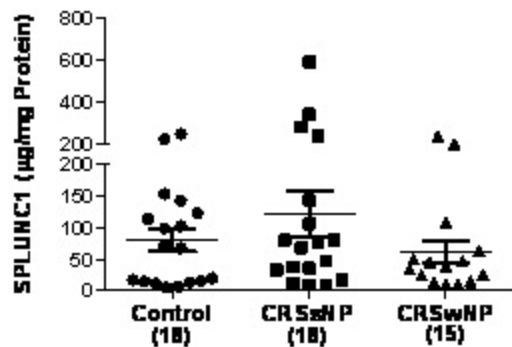**B****LPLUNC2**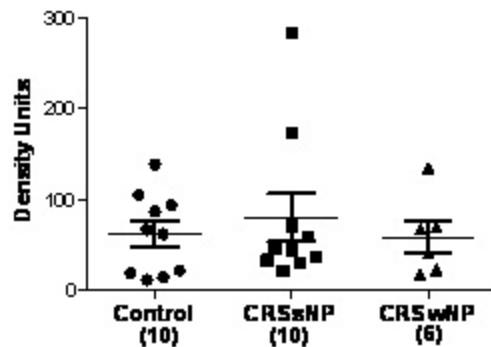

Figure E3

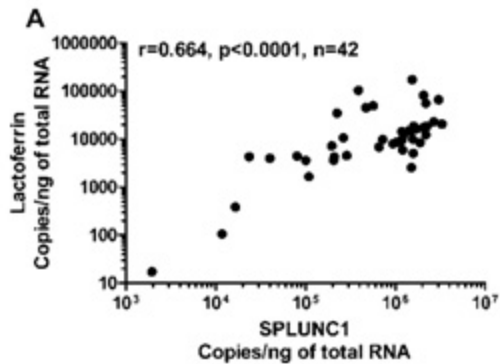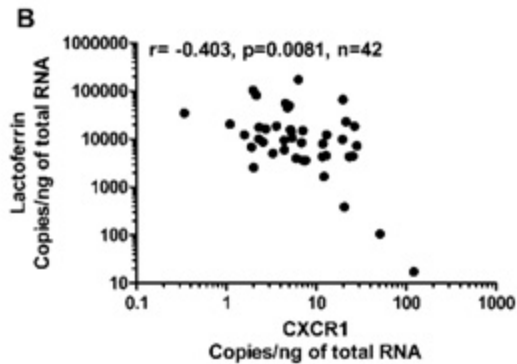

Figure E4
